# Supplementary material for: Crossover from Ising- to Rashba-type superconductivity in epitaxial Bi2Se3/monolayer NbSe2 heterostructures
Source: Springer Nature journal article supplement (doi:10.1038/s41563-022-01386-z), 2022-10-27
Supplement: 41563_2022_1386_MOESM1_ESM.pdf [file 41563_2022_1386_MOESM1_ESM.pdf]

---

# Crossover from Ising- to Rashba-type superconductivity in epitaxial $\text{Bi}_2\text{Se}_3$ /monolayer $\text{NbSe}_2$ heterostructures

---

In the format provided by the authors and unedited

---

## Content:

### I. Supplementary Text for Extended Data Figs. 1 to 10

### II. Supplementary Text for Supplementary Figs. 1 to 6.

## References

### I. Supplementary Text for Extended Data Figs. 1 to 10

[Extended Data Fig. 1](#) shows the reflection high energy electron diffraction (RHEED) patterns of the bilayer graphene terminated 6H-SiC (0001) substrate, the monolayer NbSe<sub>2</sub> film, and the 5 QL Bi<sub>2</sub>Se<sub>3</sub>/monolayer NbSe<sub>2</sub> heterostructure. The sharp RHEED patterns of the monolayer NbSe<sub>2</sub> film ([Extended Data Fig. 1b](#)) and the 5 QL Bi<sub>2</sub>Se<sub>3</sub>/monolayer NbSe<sub>2</sub> heterostructure ([Extended Data Fig. 1c](#)) indicate the highly ordered crystallinity of our Bi<sub>2</sub>Se<sub>3</sub>/monolayer NbSe<sub>2</sub> heterostructures.

[Extended Data Figs. 2a to 2c](#) show the cross-sectional annular dark-field scanning transmission electron microscope (ADF-STEM) images of the 6QL Bi<sub>2</sub>Se<sub>3</sub>/monolayer NbSe<sub>2</sub> heterostructure along different orientations. As described in the main text, we observed a BiSe bilayer with a cubic lattice structure at the Bi<sub>2</sub>Se<sub>3</sub>/NbSe<sub>2</sub> interface, which reduces the large lattice mismatch between monolayer NbSe<sub>2</sub> and Bi<sub>2</sub>Se<sub>3</sub> layer (~20%)<sup>1</sup>. Moreover, our ADF-STEM measurements show that the atomic structures of the monolayer NbSe<sub>2</sub> and Bi<sub>2</sub>Se<sub>3</sub> layers can not be simultaneously resolved, which indicates that a misorientation exists between the monolayer NbSe<sub>2</sub> and Bi<sub>2</sub>Se<sub>3</sub> layers. The corresponding energy dispersive spectroscopy (EDS) maps of Si, Nb, Bi, and Se further confirm the high quality of our Bi<sub>2</sub>Se<sub>3</sub>/monolayer NbSe<sub>2</sub> heterostructures ([Extended Data Figs. 2d and 2e](#)).

[Extended Data Figs. 3a](#) and [3b](#) show the Fermi surface maps of monolayer NbSe<sub>2</sub> and the 1QL Bi<sub>2</sub>Se<sub>3</sub>/monolayer NbSe<sub>2</sub> heterostructure. For monolayer NbSe<sub>2</sub>, we observed a hole pocket near the  $\Gamma$  point and a hole pocket near the K point of the Brillouin zone (BZ) ([Extended Data Fig. 3a](#)). After the deposition of 1QL Bi<sub>2</sub>Se<sub>3</sub>, one more electron pocket with a circular shape from 1QL Bi<sub>2</sub>Se<sub>3</sub> appears near the  $\Gamma$  point, suggesting its isotropic property ([Extended Data Fig. 3b](#)).

Next, we studied the electronic band alignment between monolayer NbSe<sub>2</sub> and the 1QL Bi<sub>2</sub>Se<sub>3</sub>/monolayer NbSe<sub>2</sub> heterostructure. For monolayer NbSe<sub>2</sub>, a hole pocket crosses the chemical potential near the  $\Gamma$  point, confirming its monolayer characteristic ([Extended Data Fig. 3c](#))<sup>2,3</sup>. For the 1QL Bi<sub>2</sub>Se<sub>3</sub>/monolayer NbSe<sub>2</sub> heterostructure, a near-parabolic band appears near the  $\Gamma$  point ([Extended Data Fig. 3d](#)), which is analogous to that of the 1QL Bi<sub>2</sub>Se<sub>3</sub> directly grown on epitaxial bilayer graphene substrates<sup>4</sup>. In addition to this electron pocket of 1QL Bi<sub>2</sub>Se<sub>3</sub>, the valence bands of monolayer NbSe<sub>2</sub> can still be resolved but with a weaker band spectrum intensity ([Extended Data Fig. 3d](#)). To quantitatively study the band alignment, we extracted the energy distribution curves (EDCs) at the  $\Gamma$  point in both monolayer NbSe<sub>2</sub> and the 1QL Bi<sub>2</sub>Se<sub>3</sub>/monolayer NbSe<sub>2</sub> heterostructure ([Extended Data Fig. 3e](#)). We found that the peak positions of one specific valence band of monolayer NbSe<sub>2</sub> remain the same before and after the deposition of 1QL Bi<sub>2</sub>Se<sub>3</sub>. This observation implies an ignorable charge transfer between monolayer NbSe<sub>2</sub> and Bi<sub>2</sub>Se<sub>3</sub> layers in our Bi<sub>2</sub>Se<sub>3</sub>/monolayer NbSe<sub>2</sub> heterostructures.

To highlight the Rashba-type bulk quantum well (QW) bands and spin-nondegenerate Dirac surface states (SSs), we performed the second derivative analysis of the ARPES data in [Figs. 2b](#) to [2f](#) of the main text. For the  $m=2$  sample, besides the band bending-induced Rashba-type SSs (Ref. <sup>4</sup>), a bulk QW state with large Rashba band splitting (i.e. QW1) appears ([Extended Data Fig. 4a](#)). For the  $m \geq 3$  samples, the SSs become gapless, a signature of crossover from 2D to 3D TI

regimes<sup>5</sup>. We observed one more Rashba-type bulk QW state (i.e. QW2) (Extended Data Figs. 4b to 4e). In addition to the method used in the manuscript to estimate the Rashba coupling strength  $\alpha_R$ , we can also deduce  $\alpha_R$  by fitting the spin-split Rashba band dispersions using the following equation<sup>6</sup>:

$$E(k) = E_0 + \frac{\hbar^2 k^2}{2m^*} \pm (\alpha_R k + \beta_R k^3) \quad (\text{S1})$$

Here  $m^*$  is the effective electron mass and  $\beta_R$  is the 3<sup>rd</sup> order Rashba splitting parameter. Since the inner and outer branches of the Rashba bands in Bi<sub>2</sub>Se<sub>3</sub>/monolayer NbSe<sub>2</sub> heterostructures merge at finite  $k$  rather than the time-reversal invariant momenta at Brillouin zone centers and/or boundaries, we introduced an isotropic 3<sup>rd</sup> order Rashba term in Eq. (S1).

Through the fitting process for the ARPES data, we obtained the 1<sup>st</sup> order Rashba splitting parameter  $\alpha_R \sim 0.95 \text{ eV} \cdot \text{\AA}$  for the  $m = 2$  sample, which is in good agreement with  $\alpha_R \sim 1.0 \text{ eV} \cdot \text{\AA}$  calculated by  $2E_R/k_R$ . We noted that the value of  $\alpha_R$  in the 2QL Bi<sub>2</sub>Se<sub>3</sub>/monolayer NbSe<sub>2</sub> heterostructure is comparable to that of the Rashba splitting of Bi<sub>2</sub>Se<sub>3</sub> bulk conduction QW states ( $\alpha_R \sim 0.79 \text{ eV} \cdot \text{\AA}$  with potassium doping;  $\alpha_R \sim 1.3 \text{ eV} \cdot \text{\AA}$  with rubidium doping)<sup>7-10</sup> but orders of magnitude larger than that of the Rashba splitting in conventional semiconducting two-dimensional electron gases ( $\alpha_R \sim 0.09 \text{ eV} \cdot \text{\AA}$  in InAs/GaSb;  $\alpha_R \sim 0.06 \text{ eV} \cdot \text{\AA}$  in InAs/AlSb;  $\alpha_R \sim 0.04 \text{ eV} \cdot \text{\AA}$  in InGaAs/InAlAs)<sup>11-13</sup>.

Moreover, we found that the  $\alpha_R$  value of QW1 decreases with increasing  $m$  and disappears for the  $m \geq 6$  samples. However, the  $\alpha_R$  value of QW2 decreases slightly with increasing  $m$  but remains a large value ( $\sim 0.63 \text{ eV} \cdot \text{\AA}$ ) in the  $m=6$  sample (Extended Data Fig. 4f). We noted that the  $\alpha_R$  value of QW2 is larger than that of QW1 for the  $m \geq 5$  samples. This property is different from the band bending induced bulk Rashba-type bands in Bi<sub>2</sub>Se<sub>3</sub> single crystals<sup>7-10</sup>.

Next, we discussed the Dirac point (or the middle of the hybridization gap) shift towards bulk conduction bands with increasing  $m$  (Fig. 2 and Extended Data Fig. 4). This phenomenon has been observed in MBE-grown  $\text{Bi}_2\text{Se}_3$  films on either metallic or insulating substrates, including bilayer graphene<sup>4</sup>, sapphire<sup>14</sup>, and Si(111) (Ref. <sup>15</sup>). Therefore, it is unlikely that the charge transfer from the substrates plays a major role in the Dirac point shift in  $\text{Bi}_2\text{Se}_3$  films with increasing the thickness  $m$ , as discussed in Ref. <sup>4</sup>. Prior studies have demonstrated that the formation of the Se vacancies is sensitive to the growth conditions<sup>4,16</sup> and the quantum confinement-induced band bending effect in the surface layers of  $\text{Bi}_2\text{Se}_3$  bulk crystals<sup>10</sup>. Therefore, we speculate that the Dirac point shift in MBE-grown  $\text{Bi}_2\text{Se}_3$  films might be a result of the film thickness-dependent concentration of Se vacancies or the band bending effect in the surface layers. More experiments are needed to clarify this issue in the future.

Extended Data Figs. 5a and 5b show the  $R$ - $T$  curves of monolayer  $\text{NbSe}_2$  under different  $\mu_0 H_\perp$  and  $\mu_0 H_\parallel$ . We found that the superconductivity in monolayer  $\text{NbSe}_2$  is suppressed by an out-of-plane magnetic field much more rapidly than that by an in-plane magnetic field, consistent with prior studies<sup>17,18</sup>. To quantitatively verify the Ising-type superconducting pairing symmetry in our monolayer  $\text{NbSe}_2$ , we plotted its  $H_{c2,\perp}$ - $T$  and  $H_{c2,\parallel}$ - $T$  curves.  $H_{c2,\perp}$  shows a good linear dependence on  $T$ , while  $H_{c2,\parallel}$  shows a square-root dependence on  $T$ . The extracted  $H_{c2,\parallel}$  at  $T=0$  K is  $\sim 25$  T, greater than 4.9 times the Pauli limit  $H_p$ , ( $H_p \sim 1.86T_c \sim 5.3$  T), confirming the Ising-type pairing symmetry in our monolayer  $\text{NbSe}_2$  (Refs. <sup>17,18</sup>).

Extended Data Fig. 6 shows the magnetoresistance of  $m\text{QL}$   $\text{Bi}_2\text{Se}_3/\text{monolayer NbSe}_2$  heterostructures under in-plane magnetic fields and different temperatures. We normalized the magnetoresistance  $R$  to the normal resistance at  $\mu_0 H_\parallel \sim 6$  T for the  $m=1$  sample and  $\mu_0 H_\parallel \sim 4$  T for the  $m \geq 2$  samples, respectively. The  $H_{c2,\parallel}$  value is determined as the magnetic field at which the

normalized resistance reaches  $\sim 0.5$ . The  $H_{c2,\parallel} \sim T/T_c$  phase diagram is shown in Fig. 3b of the main text.

Extended Data Fig. 7 shows the magnetoresistance of monolayer NbSe<sub>2</sub> and  $m$ QL Bi<sub>2</sub>Se<sub>3</sub>/monolayer NbSe<sub>2</sub> heterostructures with  $m=1, 2$ , and 6 under out-of-plane magnetic fields at different temperatures. We determined the  $H_{c2,\perp}$  value as the magnetic field at which the magnetoresistance reaches  $\sim 50\%$  of the normal resistance. The  $H_{c2,\perp} \sim T/T_c$  phase diagram is shown in Fig. 3c of the main text.

To complement the ARPES data shown in Extended Data Fig. 3, we carried out more first-principles calculations on the BiSe/monolayer NbSe<sub>2</sub> heterostructure and found that it maintains a Fermi surface as large as that in monolayer NbSe<sub>2</sub>. Here, the monolayer NbSe<sub>2</sub> accepts  $\sim 0.04e$  from the cubic BiSe layer and thus the band filling occupation of the monolayer NbSe<sub>2</sub> layer does not show significant change. The charge transfer between  $\sqrt{2} \times 4\sqrt{2}$  BiSe on  $\sqrt{3} \times 7$  NbSe<sub>2</sub> layers (Extended Data Fig. 8) is estimated from the vertical dipole moment and interlayer separation from our first-principles calculations. Based on the calculated  $\sim 1.5 e\text{\AA}$  dipole moment for the entire supercell and a lower estimate of the interlayer separation  $\sim 2.7 \text{\AA}$  (between the upper Se layer in monolayer NbSe<sub>2</sub> and lower Bi layer in BiSe), we found that the charge transfer per NbSe<sub>2</sub> formula unit is  $\sim 0.04e$ . This charge transfer is small because any small charge transfer between two layers sets up a vertical electric field between the layers that opposes further the charge transfer, similar to the case in a prior study<sup>19</sup>. The smallness of the charge transfer is also reflected in the Fermi level in monolayer NbSe<sub>2</sub> largely remaining at a level that half-fills its top valence band after the coverage of the BiSe layer, as shown in the projected band structures of BiSe/monolayer NbSe<sub>2</sub> (Extended Data Fig. 8b left) and freestanding monolayer NbSe<sub>2</sub> ((Extended Data Fig. 8b right).

In freestanding  $m$ QL  $\text{Bi}_2\text{Se}_3$  films,  $(m-1)$  QW states are expected to appear in the bulk conduction bands, as highlighted in orange in the calculated band structures ([Extended Data Fig. 9](#)). In our ARPES experiments, we observed only the first two QW states for the  $m \leq 6$  samples. We may resolve more bulk QW states in highly electron doped  $\text{Bi}_2\text{Se}_3$  films with  $m \geq 4$ . Note that in our DFT calculations, we ignored the effect of the substrates and did not include any defects and disorders (e.g. Se vacancies) in the supercells of the  $m$ QL  $\text{Bi}_2\text{Se}_3$ . Therefore, the calculated band structures here do not include the information of the Dirac point shift in  $\text{Bi}_2\text{Se}_3$  films with increasing  $m$  observed in our ARPES experiments ([Fig. 2](#) and [Extended Data Fig. 4](#)).

In the main text, we associated the three QW states in the 3QL  $\text{Bi}_2\text{Se}_3/\text{BiSe}$  heterostructure to the three QW states in a 4QL  $\text{Bi}_2\text{Se}_3$  film, due to the similarities in their partial charge densities (see [Fig. 4g](#)). To demonstrate the defining characteristics of the three QW states in a 4QL  $\text{Bi}_2\text{Se}_3$  film, we plotted the partial charge densities of QW1, QW2, and QW3 using yellow isosurfaces, along with their  $xy$ -plane-averaged representations  $\rho_{xy}(z)$  ([Extended Data Fig.10](#)). We also sketched out the charge densities of the envelope wavefunctions of these states in black curves. The three QW states can be identified by the number of nodes in their envelope wavefunctions: 0, 1, and 2 nodes for QW1, QW2, and QW3.

## II. Supplementary Text for Supplementary Figs. 1 to 6.

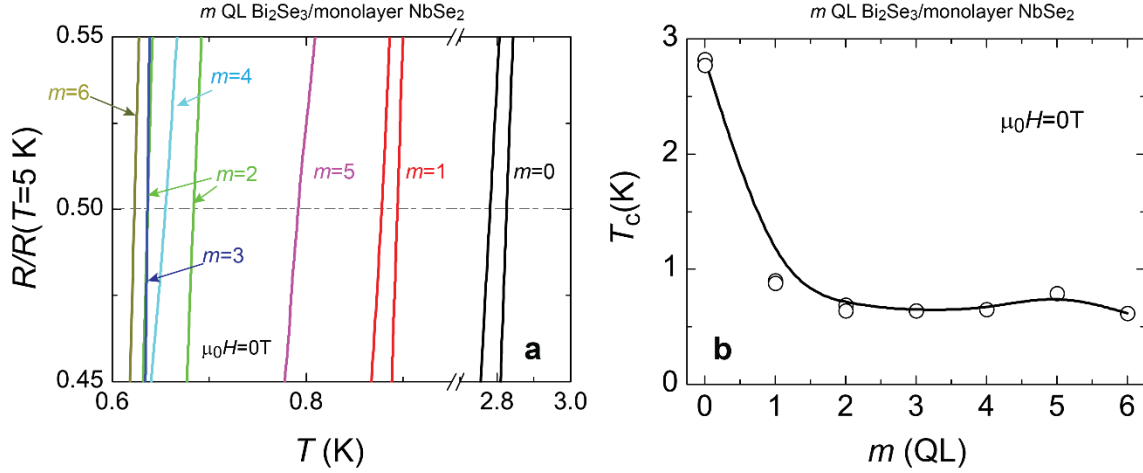

**Supplementary Fig. 1 |  $T_c$  of the  $m$  QL  $\text{Bi}_2\text{Se}_3/\text{monolayer NbSe}_2$  heterostructures.** (a) Enlarged  $R$ - $T$  curves of the  $m$  QL  $\text{Bi}_2\text{Se}_3/\text{monolayer NbSe}_2$  heterostructures under zero magnetic field.  $R$  is normalized to the normal state resistance at  $T = 5$  K. (b)  $T_c$  of the  $m$  QL  $\text{Bi}_2\text{Se}_3/\text{monolayer NbSe}_2$  heterostructures as a function of  $m$ .  $T_c$  is determined by the temperature at which  $R/R(T=5\text{K}) \sim 0.5$ . Two  $m=0$ ,  $m=1$ , and  $m=2$  samples are included in (a and b).

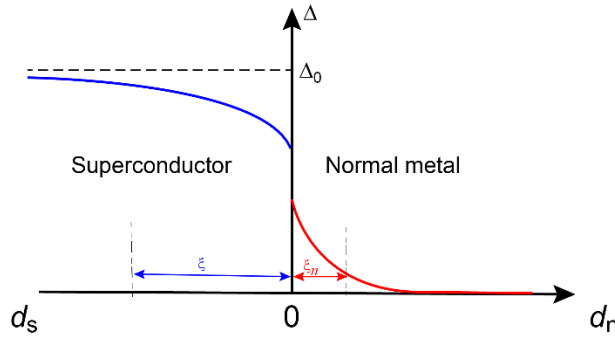

**Supplementary Fig. 2 | Superconducting proximity effect in normal metal/superconductor heterostructures.** The superconducting pairing potential  $\Delta$  near a normal metal/superconductor interface.  $\Delta_0$  is the pairing potential deep into a bulk superconductor. Two superconducting coherence lengths  $\xi_n$  and  $\xi$  are involved here.

Supplementary Fig. 1a shows the enlarged  $R$ - $T$  curves of the  $m$  QL  $\text{Bi}_2\text{Se}_3/\text{monolayer NbSe}_2$  heterostructures with  $0 \leq m \leq 6$  under zero magnetic field (Fig. 3a of the main text). Supplementary Fig. S1b shows the  $T_c$  value of  $m$ QL  $\text{Bi}_2\text{Se}_3/\text{monolayer NbSe}_2$  heterostructures as a function of  $m$ . Here, we found that the value of  $T_c$  decreases from  $\sim 2.8$  K for the monolayer



NbSe<sub>2</sub> to ~0.6 K for the  $m = 6$  sample. The superconducting proximity effect-induced  $T_c$  reduction in Bi<sub>2</sub>Se<sub>3</sub>/monolayer NbSe<sub>2</sub> heterostructures can be attributed to the “leakage” of Cooper pairs from the monolayer NbSe<sub>2</sub> into the Bi<sub>2</sub>Se<sub>3</sub> layer. For a normal metal/superconductor interface, the superconducting pairing potential  $\Delta$  as a function of depth is shown in [Supplementary Fig. S2](#). On the normal metal side, the pairing potential is nonzero and decreases over a length scale  $\xi_n$  into the metal. On the superconductor side, the pairing potential decreases over a length scale  $\xi$  from its bulk value  $\Delta_0$  towards the interface. In other words, the thinner the superconductor used in normal metal/superconductor heterostructures, there should be a stronger  $T_c$  reduction with increasing thickness of the normal metal layer<sup>20,21</sup>. In our experiments, the superconductor is monolayer NbSe<sub>2</sub>, which is much thinner than  $\xi \sim 2.3$  nm of bulk NbSe<sub>2</sub> (Ref.<sup>22</sup>), the superconducting pairing potential  $\Delta$  is greatly reduced in monolayer NbSe<sub>2</sub> when it is covered by Bi<sub>2</sub>Se<sub>3</sub> films. Therefore, the value of  $T_c$ , which is determined by the pairing potential  $\Delta$  of the monolayer NbSe<sub>2</sub>, actually decreases with increasing the thickness of Bi<sub>2</sub>Se<sub>3</sub> films.

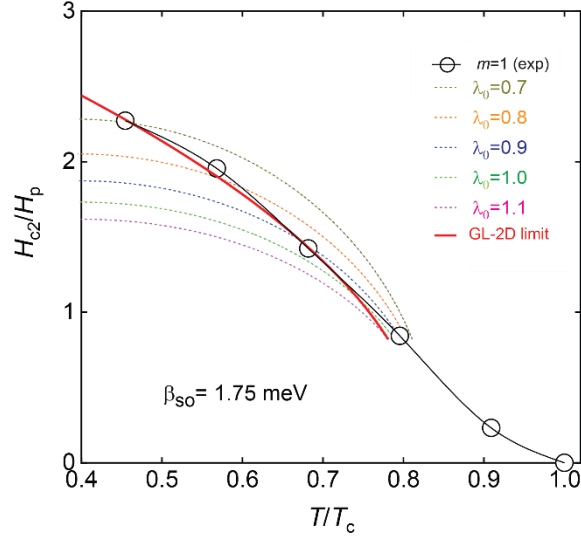

**Supplementary Fig. 3 | Theoretical calculations of the 1QL Bi<sub>2</sub>Se<sub>3</sub>/monolayer NbSe<sub>2</sub> heterostructure.** The calculated in-plane upper critical magnetic field normalized to the Pauli paramagnetic field  $H_{c2,||}/H_P$  as a function of the normalized temperature  $T/T_c$  under different inter-valley scattering  $\lambda_0$  and  $\beta_{so}=1.75$  meV. The experimental data of the  $m = 1$  sample cannot be fitted by either linear- $T$  behavior (GL-3D limit) or square-root- $T$  behavior (GL-2D limit, red solid line). A moderate fit with  $\lambda_0 \sim 0.9$  meV and  $\beta_{so} \sim 1.75$  meV suggests that the inter-valley scattering may provide an alternative explanation for the reduction of  $H_{c2,||}/H_P$  in 1 QL Bi<sub>2</sub>Se<sub>3</sub>/monolayer NbSe<sub>2</sub> heterostructure .

We now present an alternative understanding for the reduction of  $H_{c2,||}$  in the 1QL Bi<sub>2</sub>Se<sub>3</sub>/monolayer NbSe<sub>2</sub> heterostructure, compared to the  $H_{c2,||}$  value in monolayer NbSe<sub>2</sub>. Our STEM measurements clearly show that a BiSe layer is stabilized between monolayer NbSe<sub>2</sub> and Bi<sub>2</sub>Se<sub>3</sub> layers (Fig. 1b and Extended Data Fig. 2). Since this interfacial BiSe layer has a cubic lattice structure, it might induce a moiré potential to the bottom monolayer NbSe<sub>2</sub>. Therefore, we phenomenologically introduced an inter-layer inter-valley scattering potential  $\lambda_0$  to investigate the suppression of  $H_{c2,||}/H_P$  through tuning  $\lambda_0$ . In our calculations, we considered the following

model Hamiltonian without Rashba spin-orbit coupling for the 1QL Bi<sub>2</sub>Se<sub>3</sub>/monolayer NbSe<sub>2</sub> heterostructure,

$$H_0 = \left( \frac{p^2}{2m_h} - \mu \right) \tau_0 s_0 + \beta_{so} \tau_z s_z + H_x s_x + \lambda_0 \tau_x s_0 \quad (\text{S2})$$

Here, we assumed  $\lambda_0$  to be momentum independent. Using Eq. (S2), the solution of Eq. (7) in the [Method](#) section of the main text was given by

$$\text{Log} \left[ \frac{T}{T_c} \right] = \frac{1}{2} [C_0(\rho_-) + C_0(\rho_+)] + \frac{1}{2} [C_0(\rho_-) - C_0(\rho_+)] \times \frac{\beta_{so}^2 + \lambda_0^2 - H_x^2}{E_- E_+} \quad (\text{S3})$$

where  $E_{\pm} = \sqrt{\beta_{so}^2 + (H_x \pm \lambda_0)^2}$  and  $\rho_{\pm} = \frac{1}{2}(E_+ \pm E_-)$ . Equation (S3) is mathematically equivalent to Eq. (8) for the Rashba case in the main text by replacing  $\alpha_0 \rightarrow \lambda_0$ . Therefore, we could similarly argue that a strong inter-valley scattering would lead to the suppression of  $H_{c2,\parallel}/H_P$  ([Supplementary Fig. 3](#)).

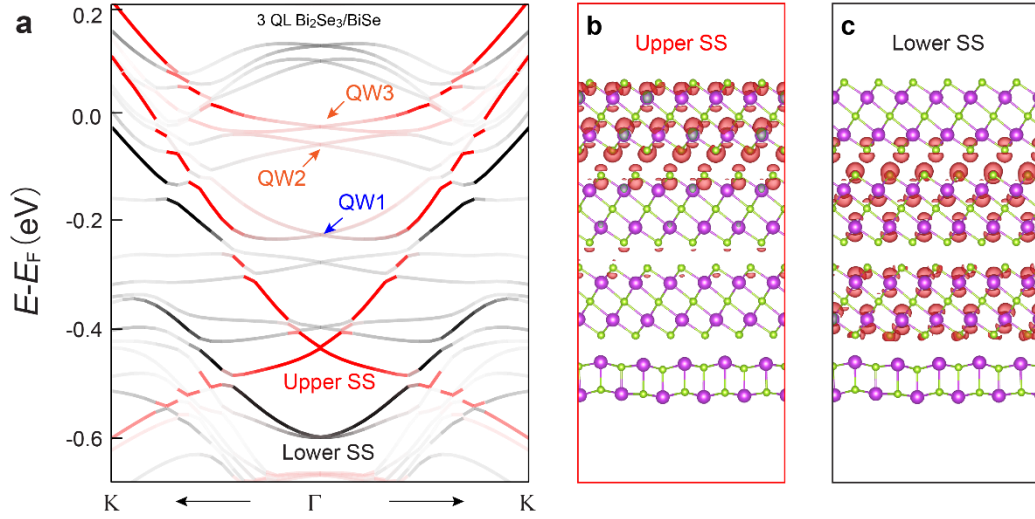

**Supplementary Fig. 4 | Upper and lower Dirac SS in 3 QL  $\text{Bi}_2\text{Se}_3/\text{BiSe}$  heterostructure.** (a) The calculated electronic band structure of 3QL  $\text{Bi}_2\text{Se}_3/\text{BiSe}$ . The projections of the total wave function onto Bi orbitals on the upper and lower surfaces of 3QL  $\text{Bi}_2\text{Se}_3$  are shown in red and black. (b and c) Partial charge densities of upper SS (b) and lower SS (c). For comparison purposes, (a) and (b) are reused here from Figs. 4d and 4e in the main text.

In the main text, our first-principles calculations focus on the upper SS and the bulk QW bands in the 3QL  $\text{Bi}_2\text{Se}_3/\text{BiSe}$  system. Here we showed the lower SS (Supplementary Fig. 4c), represented by its partial charge density in red isosurfaces. The decay length of the lower SS into the 3QL  $\text{Bi}_2\text{Se}_3$  interior ( $\sim 2\text{QL}$ ) is longer than that of the upper SS ( $\sim 1\text{QL}$ ). When the BiSe layer is removed, the decay length of the lower SS is found to be  $\sim 1\text{QL}$ .

In Fig. 4d of the main text, the DFT calculated band structure of the 3 QL  $\text{Bi}_2\text{Se}_3/\text{BiSe}$  heterostructure shows a gap of  $\sim 17\text{ meV}$  for the upper SS near  $-0.5\text{ eV}$  (Supplementary Fig. 4a). The size of this small hybridization gap is comparable to the energy resolution of our ARPES analyzer at room temperature ( $\sim 10\text{ meV}$ ). Moreover, the structure used in our DFT calculations is a 3 QL  $\text{Bi}_2\text{Se}_3/\text{BiSe}$  bilayer rather than the real 3QL  $\text{Bi}_2\text{Se}_3/\text{BiSe}/\text{monolayer NbSe}_2$  trilayer in our experiments. This may also introduce a small deviation between the DFT data and the ARPES

band map. Finally, we note that the absolute value of the calculated gap size is not intended to be quantitatively compared with the experimental data because the calculated gap size depends sensitively on the choice of the exchange-correlation functional or the overall theory level<sup>23</sup>.

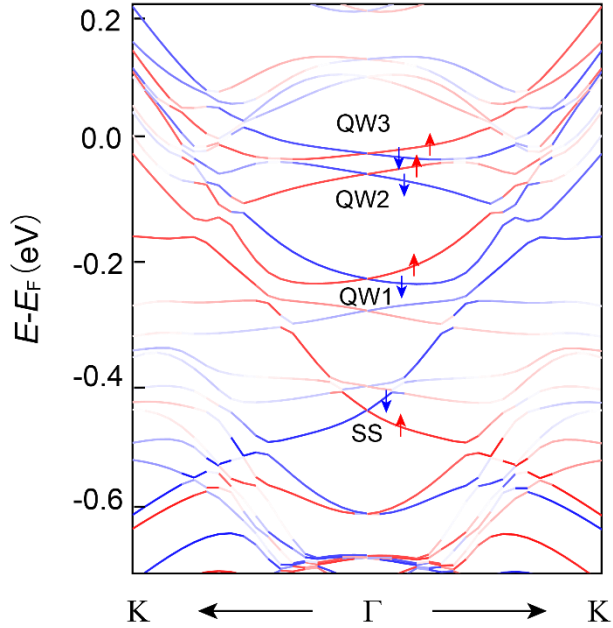

**Supplementary Fig. 5 | Rashba-type spin textures in the 3QL Bi<sub>2</sub>Se<sub>3</sub>/BiSe heterostructure.** Spin-projected band structure for the 3QL Bi<sub>2</sub>Se<sub>3</sub>/BiSe heterostructure.  $\Gamma$ -K sits along  $x$  and projections onto spins orienting along  $\pm y$  are shown in red and blue, respectively.

We further calculated the spin textures of these three bulk QW bands (i.e. QW1, QW2, and QW3) and indeed found these three QW states show a Rashba-type spin texture (Supplementary Fig. 5). For states along  $x$  (i.e.  $\Gamma$ -K direction), spins are oriented along  $\pm y$  as expected for Rashba-type spin splitting, with  $+y$  and  $-y$  orientations indicated by red and blue, respectively.

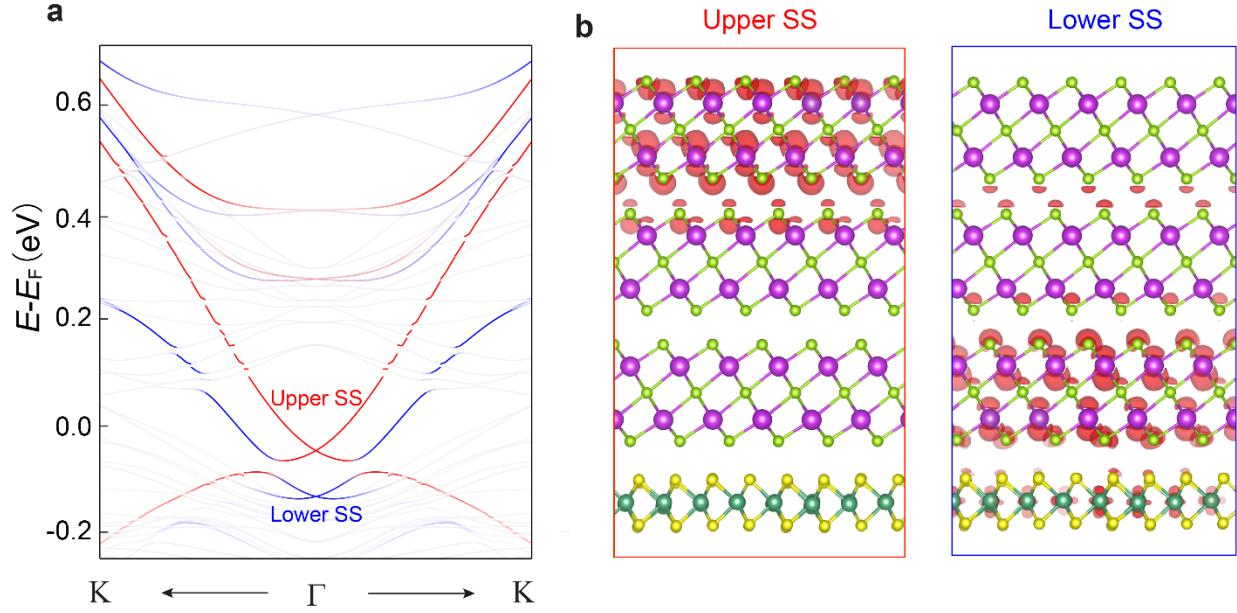

**Supplementary Fig. 6 | First-principles calculations of 3 QL  $\text{Bi}_2\text{Se}_3$ /monolayer  $\text{NbSe}_2$  without including the  $\text{BiSe}$  interfacial layer.** (a) The calculated band structure of 3QL  $\text{Bi}_2\text{Se}_3$ /monolayer  $\text{NbSe}_2$  heterostructure. The projections of the total wavefunction onto Bi orbitals on the upper and lower surfaces of 3QL  $\text{Bi}_2\text{Se}_3$  are shown in red and blue, respectively. (b) Partial charge densities for the upper and lower SSs.

The large Rashba splitting of the  $m=3$  sample in our ARPES data ( $E_R = 0.011\text{eV}$ , see Fig. 2) relies on QW states residing in an effective 4-layer structure (3QL  $\text{Bi}_2\text{Se}_3$  + a bilayer  $\text{BiSe}$ ) that has a built-in compositional asymmetry along  $z$ . The implicit condition for the above assumption is that the envelope wavefunction approximation is valid (i.e. the potential and wavefunctions vary slightly between 3QL  $\text{Bi}_2\text{Se}_3$  and  $\text{BiSe}$  layers). This condition might be fulfilled by a  $\text{BiSe}$  bilayer because the  $\text{BiSe}$  bilayer and  $\text{Bi}_2\text{Se}_3$  QL have the same elemental composition and are a part of the rocksalt lattice structure with a low-energy electronic structure determined by  $p$  orbital interactions<sup>24</sup>.

If 3QL  $\text{Bi}_2\text{Se}_3$  is grown on a substrate that is electronically distinct from  $\text{Bi}_2\text{Se}_3$  QL, the weak interaction between  $\text{Bi}_2\text{Se}_3$  and substrate can only slightly modulate the two QW states from 3QL

Bi<sub>2</sub>Se<sub>3</sub> and thus these two QW states show a much smaller Rashba splitting. [Supplementary Fig. 6a](#) shows the projected band structure of 3QL Bi<sub>2</sub>Se<sub>3</sub> on monolayer NbSe<sub>2</sub>, without including the BiSe layer. Red and blue curves indicate the projection of the total wavefunction onto Bi orbitals in the uppermost and lowermost surface layers, respectively. The two-colored states below  $E-E_F = 0\text{eV}$  can be identified to be a pristine upper SS (red) and a lower SS (blue). We found that the lower SS weakly hybridizes with NbSe<sub>2</sub> (the corresponding NbSe<sub>2</sub>-majority and lower-SS-minority hybrid state is at  $E-E_F = +0.6\text{eV}$ ). This is further confirmed by their real-space partial charge densities in [Supplementary Fig. 6b](#). For  $+0.2\text{eV} \leq (E-E_F) \leq +0.4\text{ eV}$ , two QW states appear, as expected from 3QL Bi<sub>2</sub>Se<sub>3</sub>. Since these QW wavefunctions are confined within 3QL Bi<sub>2</sub>Se<sub>3</sub>, they do not interact strongly with the bottom monolayer NbSe<sub>2</sub>. Therefore, the Rashba splitting of these QW states is only  $\sim 30\%$  in magnitude compared with those in the 3QL Bi<sub>2</sub>Se<sub>3</sub>/BiSe heterostructure, as discussed in the main text.

## References

- 1 Wang, M. X., Li, P., Xu, J. P., Liu, Z. L., Ge, J. F., Wang, G. Y., Yang, X. J., Xu, Z. A., Ji, S. H., Gao, C. L., Qian, D., Luo, W. D., Liu, C. H. & Jia, J. F. Interface structure of a topological insulator/superconductor heterostructure. *New J. Phys.* **16**, 123043 (2014).
- 2 Ugeda, M. M., Bradley, A. J., Zhang, Y., Onishi, S., Chen, Y., Ruan, W., Ojeda-Aristizabal, C., Ryu, H., Edmonds, M. T., Tsai, H. Z., Riss, A., Mo, S. K., Lee, D. H., Zettl, A., Hussain, Z., Shen, Z. X. & Crommie, M. F. Characterization of collective ground states in single-layer NbSe<sub>2</sub>. *Nat. Phys.* **12**, 92-97 (2016).
- 3 Xu, C. Z., Wang, X. X., Chen, P., Flototto, D., Hlevyack, J. A., Lin, M. K., Bian, G., Mo, S. K. & Chiang, T. C. Experimental and theoretical electronic structure and symmetry effects in ultrathin NbSe<sub>2</sub> films. *Phys. Rev. Mater.* **2**, 064002 (2018).
- 4 Zhang, Y., He, K., Chang, C. Z., Song, C. L., Wang, L. L., Chen, X., Jia, J. F., Fang, Z., Dai, X., Shan, W. Y., Shen, S. Q., Niu, Q., Qi, X. L., Zhang, S. C., Ma, X. C. & Xue, Q. K. Crossover of the Three-Dimensional Topological Insulator Bi<sub>2</sub>Se<sub>3</sub> to the Two-Dimensional Limit. *Nat. Phys.* **6**, 584-588 (2010).
- 5 Liu, C. X., Zhang, H., Yan, B. H., Qi, X. L., Frauenheim, T., Dai, X., Fang, Z. & Zhang, S. C. Oscillatory Crossover from Two-Dimensional to Three-Dimensional Topological Insulators. *Phys. Rev. B* **81**, 041307 (2010).
- 6 Michiardi, M., Bianchi, M., Dendzik, M., Miwa, J. A., Hoesch, M., Kim, T. K., Matzen, P., Mi, J. L., Bremholm, M., Iversen, B. B. & Hofmann, P. Strongly anisotropic spin-orbit splitting in a two-dimensional electron gas. *Phys. Rev. B* **91**, 035445 (2015).
- 7 Zhu, Z. H., Levy, G., Ludbrook, B., Veenstra, C. N., Rosen, J. A., Comin, R., Wong, D., Dosanjh, P., Ubaldini, A., Syers, P., Butch, N. P., Paglione, J., Elfimov, I. S. & Damascelli, A. Rashba Spin-Splitting Control at the Surface of the Topological Insulator Bi<sub>2</sub>Se<sub>3</sub>. *Phys. Rev. Lett.* **107**, 186405 (2011).
- 8 Valla, T., Pan, Z. H., Gardner, D., Lee, Y. S. & Chu, S. Photoemission Spectroscopy of Magnetic and Nonmagnetic Impurities on the Surface of the Bi<sub>2</sub>Se<sub>3</sub> Topological Insulator. *Phys. Rev. Lett.* **108**, 117601 (2012).
- 9 King, P. D. C., Hatch, R. C., Bianchi, M., Ovsyannikov, R., Lupulescu, C., Landolt, G., Slomski, B., Dil, J. H., Guan, D., Mi, J. L., Rienks, E. D. L., Fink, J., Lindblad, A.,



- Svensson, S., Bao, S., Balakrishnan, G., Iversen, B. B., Osterwalder, J., Eberhardt, W., Baumberger, F. & Hofmann, P. Large Tunable Rashba Spin Splitting of a Two-Dimensional Electron Gas in  $\text{Bi}_2\text{Se}_3$ . *Phys. Rev. Lett.* **107**, 096802 (2011).
- 10 Bahramy, M. S., King, P. D. C., de la Torre, A., Chang, J., Shi, M., Patthey, L., Balakrishnan, G., Hofmann, P., Arita, R., Nagaosa, N. & Baumberger, F. Emergent quantum confinement at topological insulator surfaces. *Nat. Commun.* **3**, 1159 (2012).
- 11 Nitta, J., Akazaki, T., Takayanagi, H. & Enoki, T. Gate control of spin-orbit interaction in an inverted  $\text{In}_{0.53}\text{Ga}_{0.47}\text{As}/\text{In}_{0.52}\text{Al}_{0.48}$  as heterostructure. *Phys. Rev. Lett.* **78**, 1335-1338 (1997).
- 12 Luo, J., Munekata, H., Fang, F. & Stiles, P. Effects of inversion asymmetry on electron energy band structures in GaSb/InAs/GaSb quantum wells. *Phys. Rev. B* **41**, 7685 (1990).
- 13 Das, B., Miller, D., Datta, S., Reifengerger, R., Hong, W., Bhattacharya, P., Singh, J. & Jaffe, M. Evidence for spin splitting in  $\text{In}_x\text{Ga}_{1-x}\text{As}/\text{In}_{0.52}\text{Al}_{0.48}\text{As}$  heterostructures as  $B \rightarrow 0$ . *Phys. Rev. B* **39**, 1411 (1989).
- 14 Chang, C. Z., He, K., Wang, L. L., Ma, X. C., Liu, M. H., Zhang, Z. C., Chen, X., Wang, Y. Y. & Xue, Q. K. Growth of Quantum Well Films of Topological Insulator  $\text{Bi}_2\text{Se}_3$  on Insulating Substrate. *SPIN* **1**, 21-25 (2011).
- 15 Sakamoto, Y., Hirahara, T., Miyazaki, H., Kimura, S. & Hasegawa, S. Spectroscopic evidence of a topological quantum phase transition in ultrathin  $\text{Bi}_2\text{Se}_3$  films. *Phys. Rev. B* **81**, 165432 (2010).
- 16 Xia, Y., Qian, D., Hsieh, D., Wray, L., Pal, A., Lin, H., Bansil, A., Grauer, D., Hor, Y. S., Cava, R. J. & Hasan, M. Z. Observation of a Large-Gap Topological-Insulator Class with a Single Dirac Cone on the Surface. *Nat. Phys.* **5**, 398-402 (2009).
- 17 Xi, X. X., Wang, Z. F., Zhao, W. W., Park, J. H., Law, K. T., Berger, H., Forro, L., Shan, J. & Mak, K. F. Ising pairing in superconducting  $\text{NbSe}_2$  atomic layers. *Nat. Phys.* **12**, 139-143 (2016).
- 18 Xing, Y., Zhao, R., Shan, P. J., Zheng, F. P., Zhang, Y. W., Fu, H. L., Liu, Y., Tian, M. L., Xi, C. Y., Liu, H. W., Feng, J., Lin, X., Ji, S. H., Chen, X., Xue, Q. K. & Wang, J. Ising Superconductivity and Quantum Phase Transition in Macro-Size Monolayer  $\text{NbSe}_2$ . *Nano Lett.* **17**, 6802-6807 (2017).

- 19 Khomyakov, P. A., Giovannetti, G., Rusu, P. C., Brocks, G., van den Brink, J. & Kelly, P. J. First-principles study of the interaction and charge transfer between graphene and metals. *Phys. Rev. B* **79**, 195425 (2009).
- 20 Stellhorn, A. *Interplay of Proximity Effects in Superconductor/ferromagnet Heterostructures*. Vol. 242 (Forschungszentrum Jülich GmbH, 2021).
- 21 Buzdin, A. I. Proximity effects in superconductor-ferromagnet heterostructures. *Rev. Mod. Phys.* **77**, 935-976 (2005).
- 22 Tessmer, S. H., Tarlie, M. B., VanHarlingen, D. J., Maslov, D. L. & Goldbart, P. M. Probing the superconducting proximity effect in NbSe<sub>2</sub> by scanning tunneling microscopy. *Phys. Rev. Lett.* **77**, 924-927 (1996).
- 23 Reid, T. K., Alpay, S. P., Balatsky, A. V. & Nayak, S. K. First-principles modeling of binary layered topological insulators: Structural optimization and exchange-correlation functionals. *Phys. Rev. B* **101**, 085140 (2020).
- 24 Lind, H., Lidin, S. & Haussermann, U. Structure and bonding properties of (Bi<sub>2</sub>Se<sub>3</sub>)<sub>m</sub>(Bi<sub>2</sub>)<sub>n</sub> stacks by first-principles density functional theory. *Phys. Rev. B* **72**, 184101 (2005).
